# Supplementary material for: Comprehensive Transcriptomic Profiling of m6A Modification in Age-Related Hearing Loss
Source: MDPI journal article supplement (doi:10.3390/biom13101537), 2023-10-18

1. Merge image of METTL3 (70KDa)

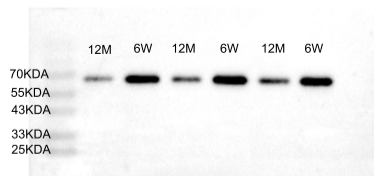

2. Merge image of FTO (58KDa)

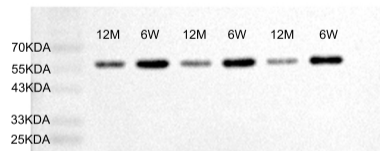

3. Merge image of WTAP (50KDa)

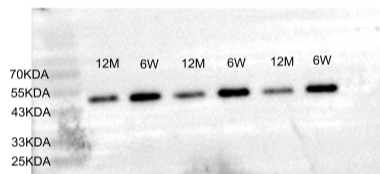

4. Merge image of ALKBH5 (40KDa)

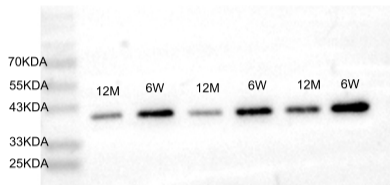

5. Merge image of GAPDH (36KDa)

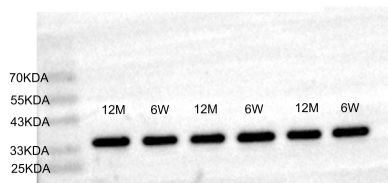

Supplement: s1 [file s1]
